# Supplementary material
Source: MDPI journal article supplement (https://www.mdpi.com/2073-4441/10/7/916)
Supplement: s1 [file s1]

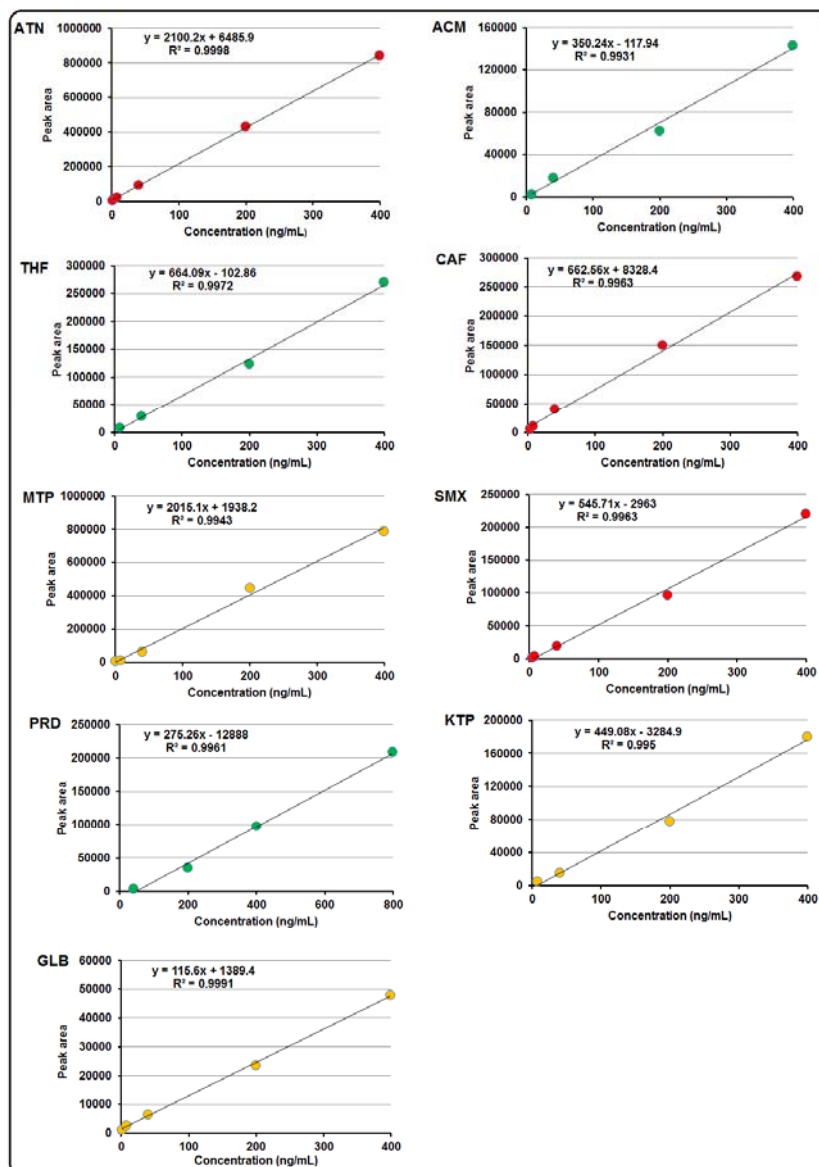

Figure S1. Calibration curve graphs for all studied pharmaceuticals.

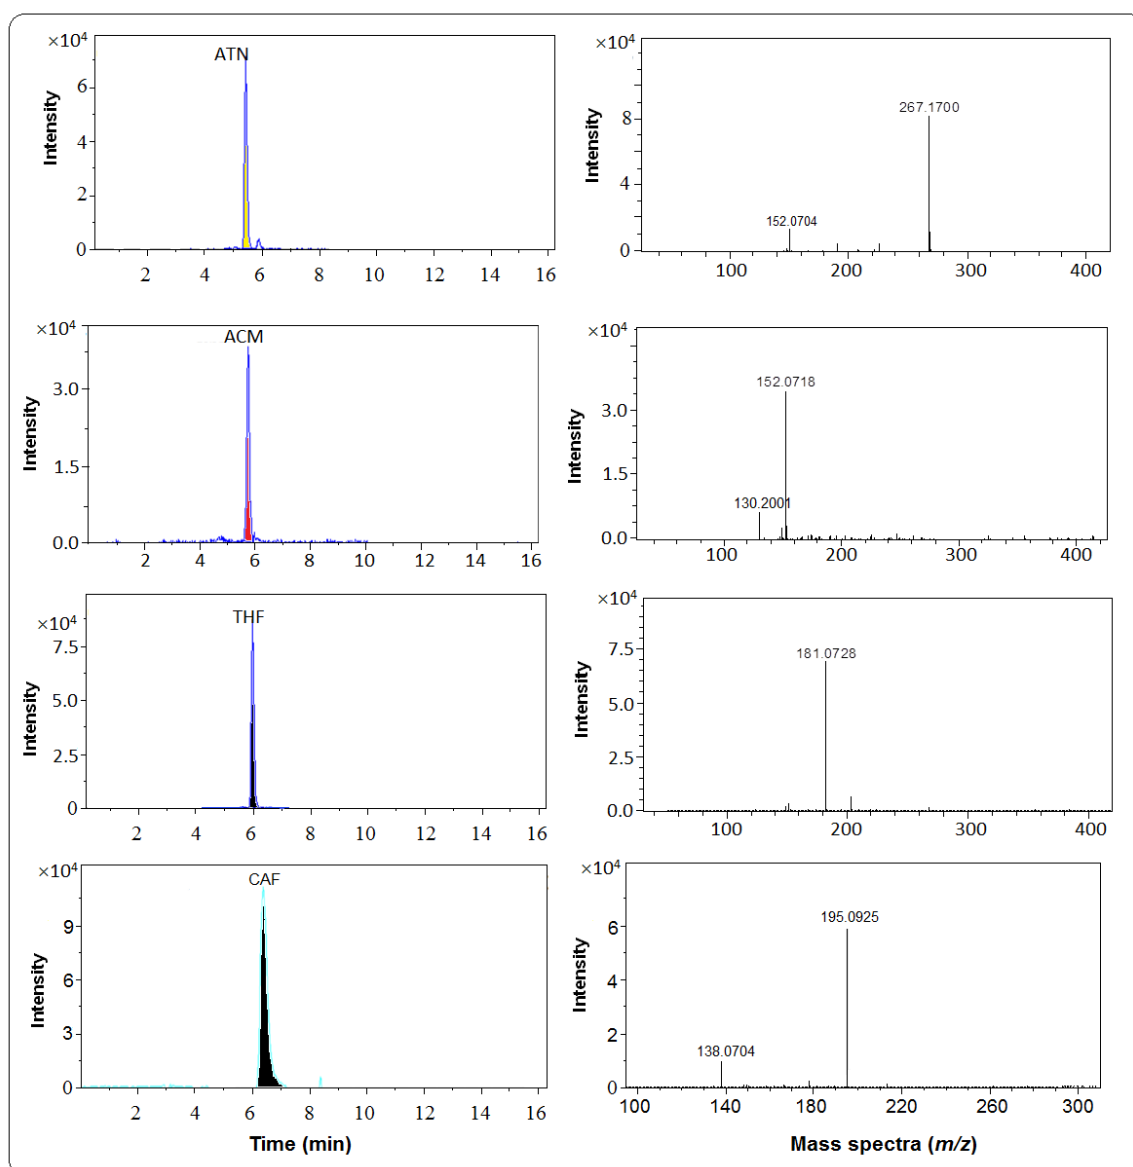

Figure S2. LC chromatograms and mass spectra of some detected pharmaceuticals in STP influent.
